# Supplementary material for: Genomic Polymorphism of Human Papillomavirus Type 52 in Women from Northeast China
Source: Int J Mol Sci. 2012 Nov 15;13(11):14962–72. doi: 10.3390/ijms131114962 (PMC3509622; doi:10.3390/ijms131114962)
Supplement: Supplementary file 1 [file ijms-13-14962-s001.pdf]

## Supplementary Information

**Table S1.** The primer for HPV 52 E6, E7, LCR and L1 sequences

| Name       | Primer sequence          | Position  | Annealing temperature (°C) |
|------------|--------------------------|-----------|----------------------------|
| E6/E7 F    | CTTATACTAGTAAAAAATAGGG   | 12–33     | 56                         |
| E6/E7R     | TTGTTTTTCTATTATTGCCTCTA  | 922–945   | 57                         |
| E6/E7-2F   | GGGAAAACATTAGAAGAG       | 353–371   | 52                         |
| E6/E7-2R   | ACGTTACACTTGGGTCACA      | 533–551   | 55                         |
| LCR F      | TTGCACCCACATGAGTAACA     | 7414–7433 | 54                         |
| LCR R      | AGTGCACACCTGGTGAGTAA     | 7891–7910 | 55                         |
| L1F        | AGGTCCTGACATTCCCATTA     | 5504–5522 | 53                         |
| L1R        | CATGACACAGACAATTACGCAACA | 7191–7214 | 55                         |
| L1-1-641F  | GTCCTCCCCTACAACATCATT    | 6233–6253 | 57                         |
| L1-1-764R  | AATCTGGATACTTACATACACTGC | 6356–6379 | 56                         |
| L1-2-1123F | TTATGTGCTGAGGTGAAAA      | 6715–6733 | 53                         |
| L1-2-1327R | CTGTATGTGTCCTCCAAAGA     | 6919–6938 | 54                         |

© 2012 by the authors; licensee MDPI, Basel, Switzerland. This article is an open access article distributed under the terms and conditions of the Creative Commons Attribution license (<http://creativecommons.org/licenses/by/3.0/>).
